# Supplementary material for: Extraction and Fractionation of Prokinetic Phytochemicals from Chrozophora tinctoria and Their Bioactivities
Source: MDPI journal article supplement (doi:10.3390/molecules27134321), 2022-07-05
Supplement: s1 [file s1]

**Table S1.** Structures of compounds of methanolic extract of *Chrozophora tinctoria* (MEC).

| S.No | Compound                                         | Group                                       | Structure                                                                            |
|------|--------------------------------------------------|---------------------------------------------|--------------------------------------------------------------------------------------|
| 1    | Toluene                                          | Benzene Derivative                          | 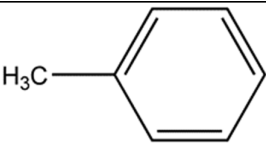  |
| 2    | o-Xylene                                         | Benzene Derivative                          |   |
| 3    | Imipramine                                       | Benzene Derivative                          |   |
| 4    | Undecane                                         | Hydrocarbon                                 |   |
| 5    | Butylated Hydroxytoluene                         | Benzene Derivative                          |  |
| 6    | Pentadecanoic acid, 14-methyl-, methyl ester     | Fatty Acid                                  |  |
| 7    | Nonanoic acid, 9-(o-propylphenyl)-, methyl ester | Fatty Acid and Benzene derivative conjugate |  |

|    |                                                           |                        |                                                                                     |
|----|-----------------------------------------------------------|------------------------|-------------------------------------------------------------------------------------|
| 8  | Hexadecanoic acid, methyl ester                           | Fatty Acid             | 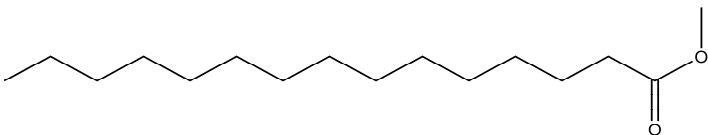  |
| 9  | 10-Octadecenoic acid, methyl ester                        | Fatty Acid             |   |
| 10 | Heptadecanoic acid, 9-methyl-,methyl ester                | Fatty Acid             |   |
| 11 | Spirost-8-en-11-one, 3-hydroxy-, (3á,5à,14á,20á,22á,25R)- | Hydrocarbon derivative |   |
| 12 | 1-Monolinoleoylglycerol trimethylsilyl ether              | Complex Fatty Acid     |  |

**Table S2.** Structures of compounds of n-Butanol extract of *Chrozophora tinctoria* (NBFC).

| S.No | Compound name                                | Structure                                                                            |
|------|----------------------------------------------|--------------------------------------------------------------------------------------|
| 1    | Pidolic Acid                                 | 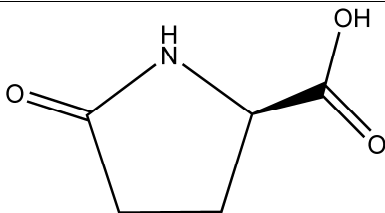 |
| 2    | Pentadecanoic acid, 14-methyl-, methyl ester |  |
| 3    | 9-Octadecenoic acid, methyl ester, (E)-      |  |
